# Supplementary material for: Crystal structure of a natural light-gated anion channelrhodopsin
Source: eLife. 2019 Jan 7;8:e41741. doi: 10.7554/eLife.41741 (PMC6336409; doi:10.7554/eLife.41741)
Supplement: Figure 3—source data 1. [file elife-41741-fig3-data1.xlsx]

## Sheet: Sheet1
WT	Y81E	I27E	K33E	A75E	T101E	L64E	M105E	L108E	A61E	L245E	P58E
4.177	6.422	3.914	11.473	0.184	0.01	0	0.008	0.127	0.121	0.617	1.668
7.011	10.962	4.984	12.587	0.233	0	0	0	0.213	0.22	0.682	2.91
9.146	8.633	7.683	6.929	0.418	0.003	0	0.014	0.267	0.072	0.396	1.38
10.353	7.093	8.437	11.928					0.28	0.038	0.875	2.06
6.342	6.256	7.437	11.87					0.437	0.042	0.72	3.101
11.119	6.075	10.218	5.145					0.117		0.402	3.281
11.067	12.629	5.148	6.848					0.15			3.82
10.5	4.897	9.165	6.513
5.884	3.636	12.872	3.684
12.503			12.844
4.627			5.67
8.037			9.129
