# Supplementary material for: Crystal structure of a natural light-gated anion channelrhodopsin
Source: eLife. 2019 Jan 7;8:e41741. doi: 10.7554/eLife.41741 (PMC6336409; doi:10.7554/eLife.41741)
Supplement: Figure 3—source data 2. [file elife-41741-fig3-data2.xlsx]

## Sheet: Sheet1
WT	Y81E	I27E	K33E	L108E	A61E	L245E	P58E	Q46A	K188A	K188E	R192E	Q46AK188A	K188AR192A	K188AR259A
76	71	78	76	75	80	79	74	71	78	77	80	76	74	90
67	73	75	73	75	73	74	70	69	80	83	75	73	68	79
61	77	77	70	69	74	73	63	76	78	81	78	79	88	92
90	85	85	79	72	80	71	75	75	78	76	86	83	80	84
91	76	86	85	72	69	74	80	89	83	75	79	80	82	83
75	85	84	87	76		87	84	73	83	81	80	79	84	84
73	82	86	81	82		77	89	87	80	79	82	79	84	76
71			86			91		83	81		81	84
78								83			81
93								81
								93
								92
								96
