# Supplementary material for: Crystal structure of a natural light-gated anion channelrhodopsin
Source: eLife. 2019 Jan 7;8:e41741. doi: 10.7554/eLife.41741 (PMC6336409; doi:10.7554/eLife.41741)
Supplement: Figure 3—source data 3. [file elife-41741-fig3-data3.xlsx]

## Sheet: Sheet1
WT	Q46A	K188A	K188E	R192E	Q46AK188A	K188AR192A	K188AR259A
-7.7	-6.7	-8.7	-2.7	-6.7	-8.7	-7.7	-11.7
-3.7	-5.7	-4.7	-3.7	-3.7	-6.7	-6.7	-3.7
-5.7	-8.7	-4.7	-2.7	-1.7	-2.7	-10.7	-1.7
-2.7	-4.7	-5.7	-9.7	-0.7	-3.7	-3.7	-4.7
-5.7	-3.7	-1.7	-4.7	-9.7	-4.7	-1.7	2.3
	-6.7	-4.7	-3.7	-5.7	-4.7	-4.7	-1.7
	-2.7		-4.7	-3.7	-4.7	-2.7	0.3
			--	-4.7
				--
				--
