# Supplementary material for: Crystal structure of a natural light-gated anion channelrhodopsin
Source: eLife. 2019 Jan 7;8:e41741. doi: 10.7554/eLife.41741 (PMC6336409; doi:10.7554/eLife.41741)
Supplement: Figure 3—source data 4. [file elife-41741-fig3-data4.xlsx]

## Sheet: Sheet1
WT	Q46A	K188A	K188E	R192E	Q46AK188A	K188AR192A	K188AR259A
-3	-3	-2	-14	-2	-3	0	-8
0	1	-4	-12	-5	-9	-4	-10
-2	-8	-7	-9	-6	-4	7	-15
-8	-11	-4	-3	-7	-9	-4	-7
-3	-1	-5	-4	-7	1	-16	-8
-9	-2	-9	-4	-2	-5	-14	-5
-5		-5		-4	-5	-11	-7
-4		-4		-5		-2	-5
-11		-4					-3
-9		-4					-9
-6
