# Supplementary material for: Crystal structure of a natural light-gated anion channelrhodopsin
Source: eLife. 2019 Jan 7;8:e41741. doi: 10.7554/eLife.41741 (PMC6336409; doi:10.7554/eLife.41741)
Supplement: Figure 5—source data 1. [file elife-41741-fig5-data1.xlsx]

## Sheet: Sheet1
WT	S43A	T71A	Y72F	Y72F_Y207F	R94A	S97E	Y207E	N239A
7.105	5.3	6.919	3.509	0.067	0.038	0.006	0.255	0.475
9.743	8.612	5.185	0.939	0.014	0.053	0.002	0.309	0.651
10.005	3.598	8.92	6.58	0.06	0.134	0.005	1.42	0.785
7.434	3.19	9.79	0.9	0.042	0.182	0.002	1.452	0.519
7.933	3.979	8.546	1.956	0.002	0.155	0.103	2.51	0.352
6.64	7.388	5.354	3.644	0.055	0.039	0.047	1.461	0.702
7.721	4.699	9.963	2.789	0.018		0.026	0.587	0.634
5.603	4.651	2.808	2.518			0.084
	2.88		0.544
